# Supplementary material for: Synthesis of novel all-cis-functionalized cyclopropane template-assembled collagen models†
Source: Royal Society of Chemistry journal article supplement (doi:10.1039/b103887g), 2001-01-01

exp4 std1h

SAMPLE DEC. & YR  
 date Oct 16 00 dfrq 399.937  
 solvent D2O dn H1  
 file exp 20  
 ACQUISITION dof 0  
 sfrq 399.938 ds nnn  
 tn H1 dm c  
 at 3.744 dmf 200  
 np 44928 dseq  
 sw 5999.3 dres 1.0  
 fb 3000 homo n  
 bs 16 PROCESSING  
 tpmr 61 stfile  
 pw 5.5 proc ft  
 dl 1.256 fn not used f  
 'ocf 600.0 math f  
 wt 16  
 ct 16 veir react  
 alock n wexp procpilot  
 gain not used wbs  
 FLAGS wnt  
 ll n  
 in n  
 qp y  
 bs mn  
 DISPLAY  
 sp 511.1  
 wp 500.0  
 va 30217  
 sc 0  
 wc 380  
 hzmm 1.32  
 is 5295.28  
 rfl 2249.8  
 rfp 1851.7  
 th 5  
 ins 100.000  
 nm ph

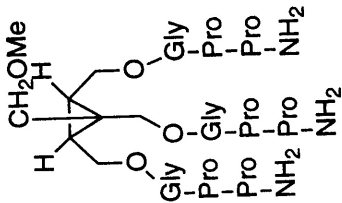

3 CF<sub>3</sub>CO<sub>2</sub>H

2b

<sup>1</sup>H NMR (D<sub>2</sub>O, 400 MHz)

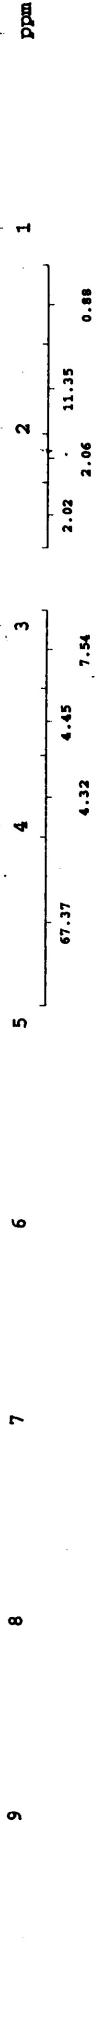

Supplement: 2b.pdf [file 2b.pdf]
