# Supplementary material for: Synthesis of novel all-cis-functionalized cyclopropane template-assembled collagen models†
Source: Royal Society of Chemistry journal article supplement (doi:10.1039/b103887g), 2001-01-01

Macrocyclic 3

exp4 std1h

```

SAMPLE          DMC. & VT
date   Mar 27 00   dfrq   399.936
solvent  CDCl3   dn      H1
file     ACQUISITION  exp   28
          dof       0
sfrq    399.937   dm      nnn
tn       3.744   dmf      C
at       44928   dseq     200
rp       5999.3   dres     1.0
sw       3000   homo     n
bs       16
          PROCESSING
tpwr     61   wtfila
pw       5.5   proc
di       1.256   fn      not used
tof     600.0   math     f
nt       16
ct       16   warr     react
alock   n      nexp     procpilot
gain   not used   wbs
          FLAGS
il      n
in      n
dp      y
hs      nn
          DISPLAY
sp      -80.1
wp      4079.2
vs      214
sc      0
wc      380
hnum    10.74
ls      807.23
rl      3282.8
rfp     2903.5
th      20
ins     100.000
nm      ph

```

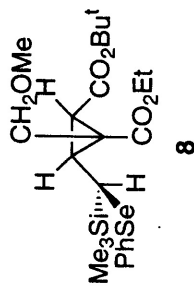

8

<sup>1</sup>H NMR (CDCl<sub>3</sub>, 400 MHz)

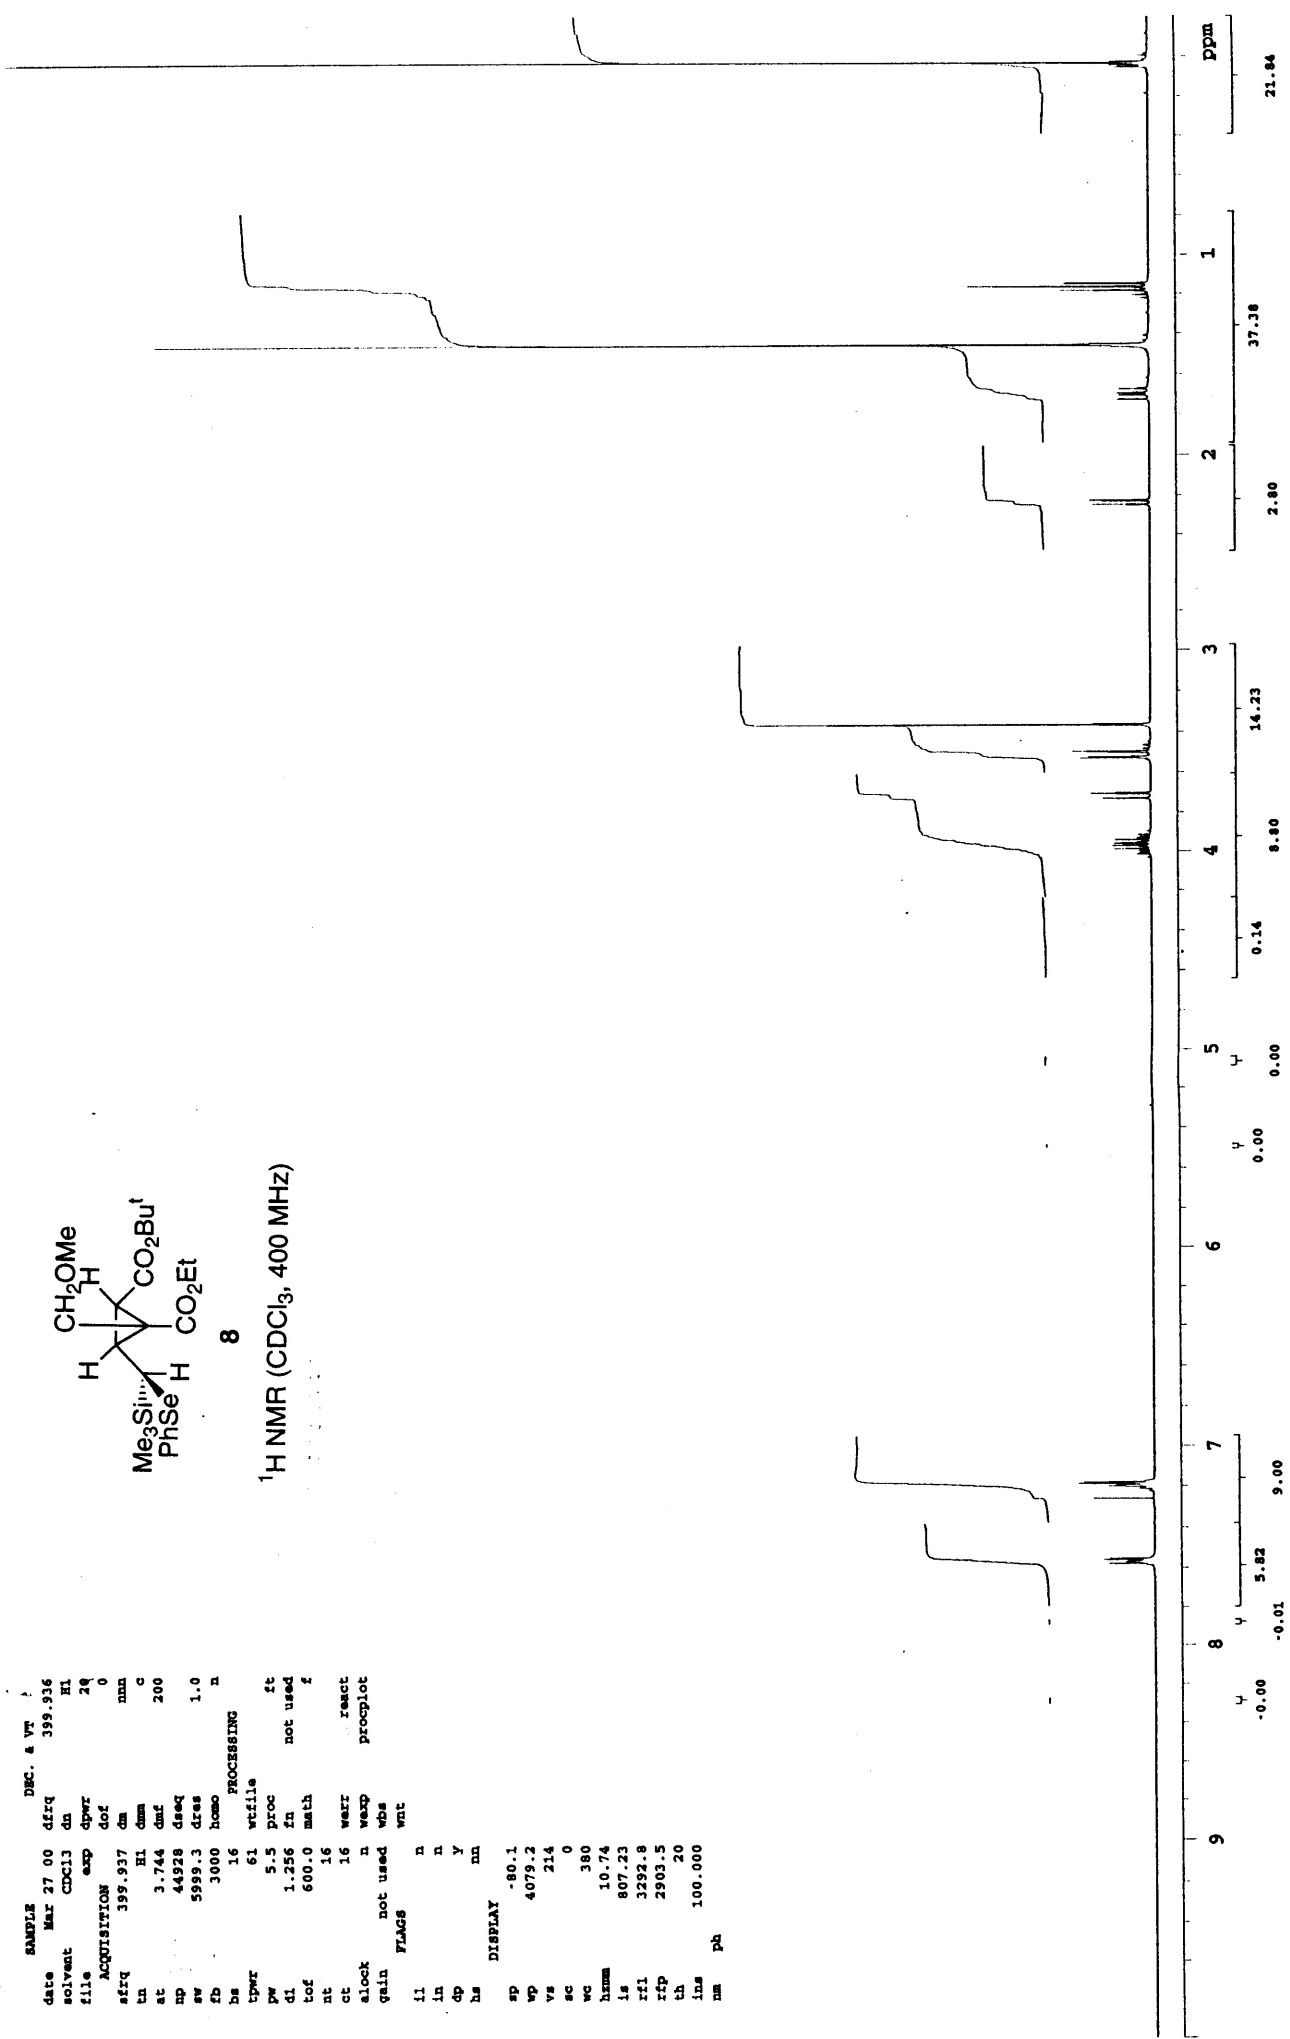

Supplement: 8.pdf [file 8.pdf]
