# Supplementary material for: Synthesis of novel all-cis-functionalized cyclopropane template-assembled collagen models†
Source: Royal Society of Chemistry journal article supplement (doi:10.1039/b103887g), 2001-01-01

exp2 stdih

SAMPLE DMC. & VT  
 date Jul 25 00 dfrq 399.936  
 solvent CDCl3 dn H1  
 file exp dprz 10  
 ACQUISITION dof 0  
 sfrq 399.937 dm nmn  
 ta HI dm c  
 at 3.744 dmf 200  
 mp 44928 dseq  
 sw 5999.3 dres 1.0  
 fb 3000 homo n  
 bs 16 PROCESSING  
 tprz 61 wfile  
 pw 5.5 proc ft  
 dl 1.256 fn not used  
 tof 600.0 math g  
 nt 16  
 ct 16 warr react  
 alock n warr procpilot  
 gain not used vbs  
 FLAGS wnt

il n  
 in n  
 dp y  
 bs nm  
 DISPLAY  
 sp -80.0  
 wp 4079.2  
 vs 214  
 sc 0  
 wc 380  
 hnm 10.74  
 ls 642.98  
 rfl 385.0  
 rfp 0  
 th 20  
 lns 100.000  
 ma ph

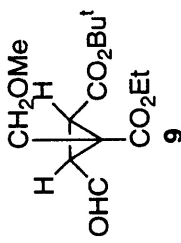

<sup>1</sup>H NMR (CDCl<sub>3</sub>, 400 MHz)

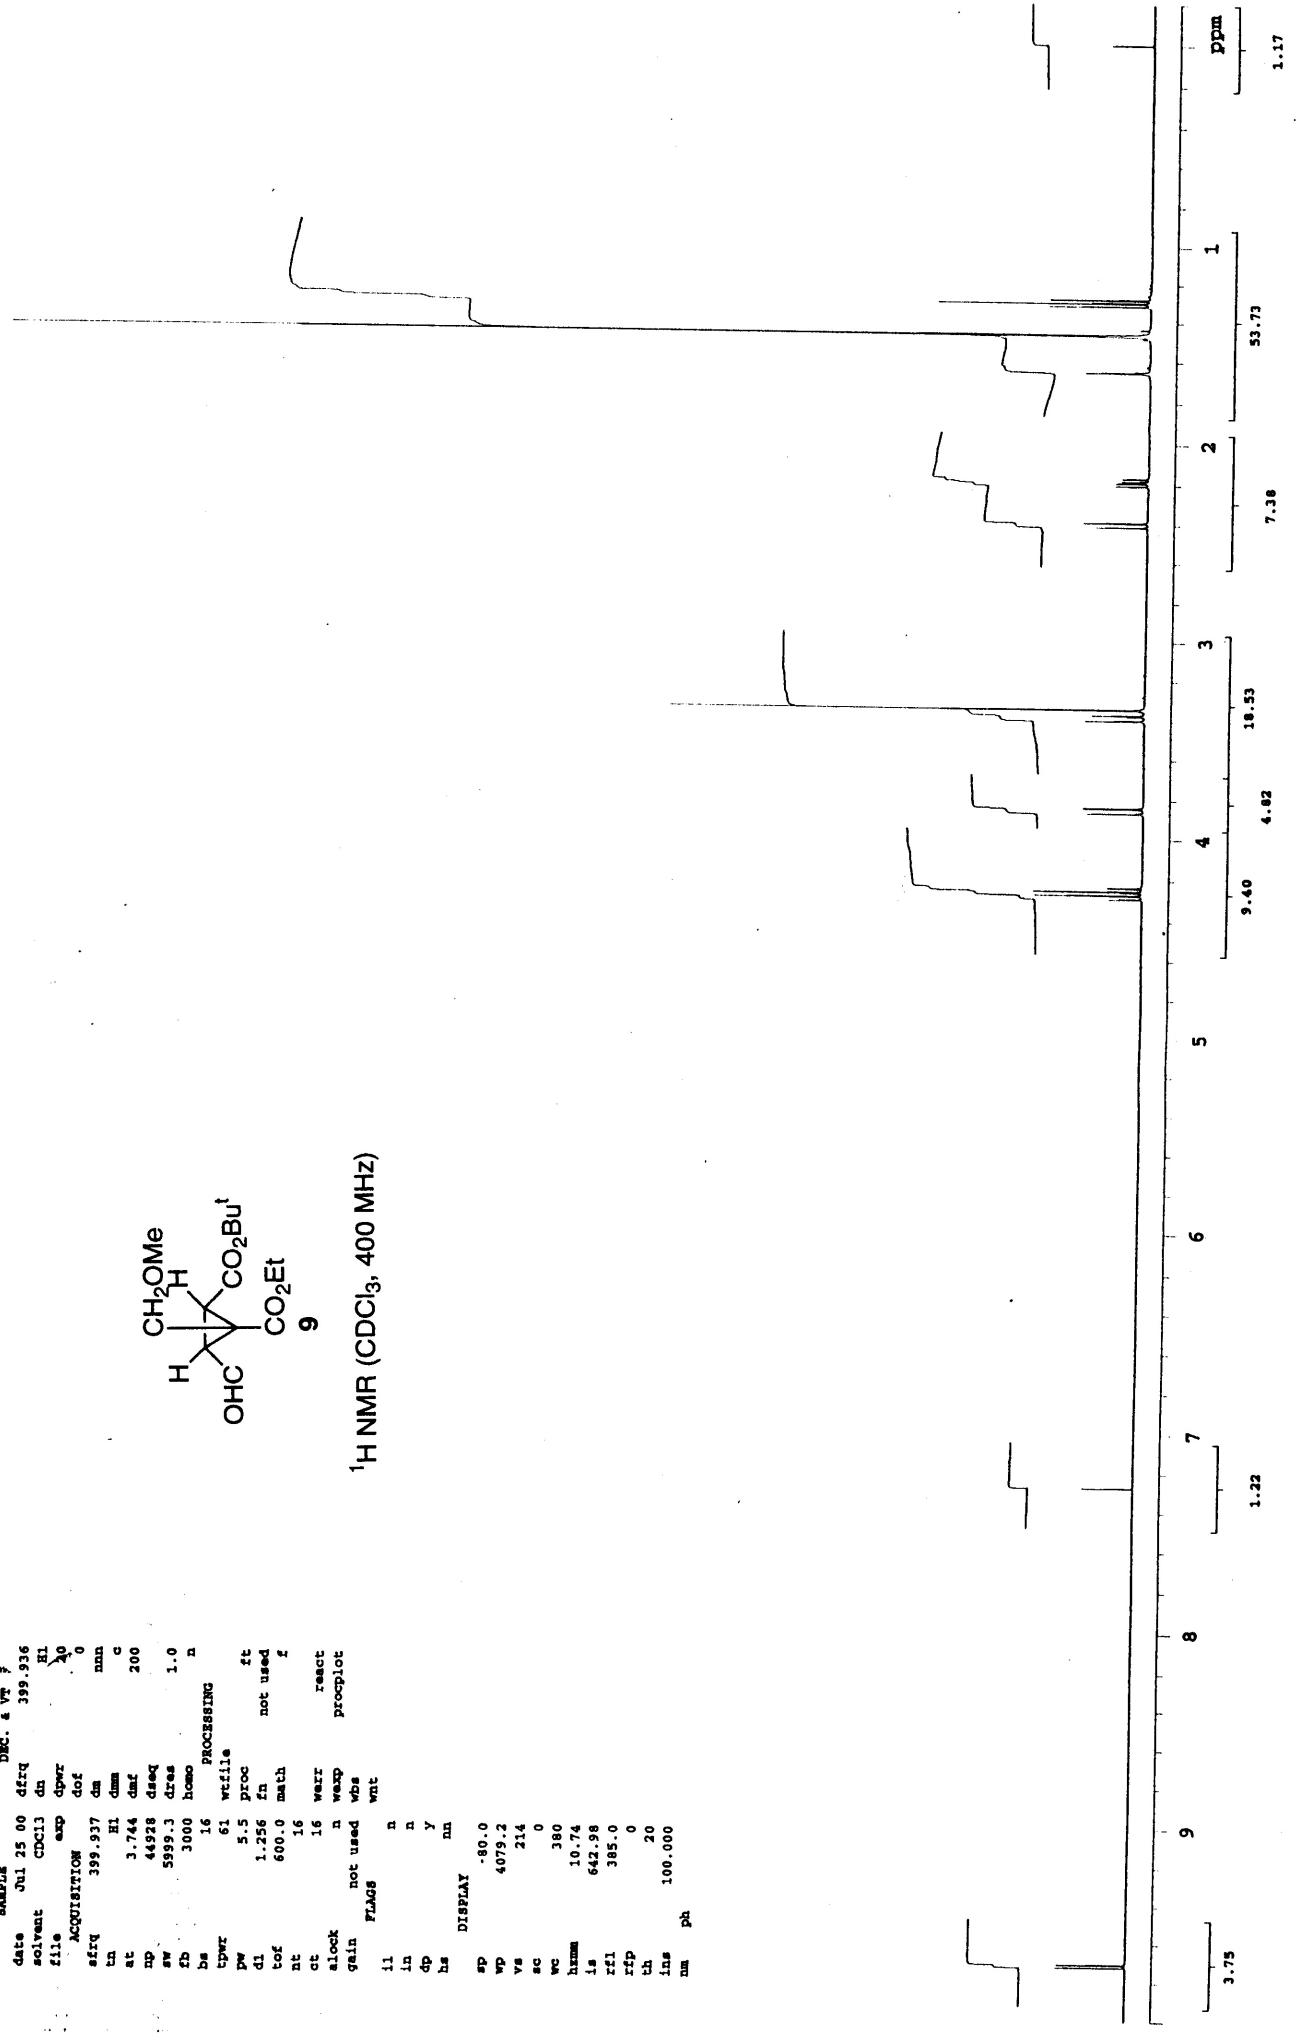

Supplement: 9.pdf [file 9.pdf]
