# Supplementary material for: Synthesis of novel all-cis-functionalized cyclopropane template-assembled collagen models†
Source: Royal Society of Chemistry journal article supplement (doi:10.1039/b103887g), 2001-01-01

trigly

exp2 std1h

```

SAMPLE          DEC. & VT
date Aug 2 00 dfrq 399.936
solvent CDCl3 dn HI
file          exp dprz 30
ACQUISITION    def 0
sfrq 399.937 da nnn
tn HI dmz c
at 3.744 dnd 200
np 44928 dseq
sw 5999.3 dres 1.0
fb 3000 homo n
bs 16 PROCESSING
tpwr 61 wtfila
pw 5.5 proc ft
dl 1.256 fn not used
tof 600.0 math f
nt 16
ct 16 warr react
alock n wexp procpilot
gain not used vbs
FLAG          vnt
il n
in n
dp y
hs mn
DISPLAY
sp -80.0
wp 4079.2
vs 214
sc 0
wc 380
hzmm 10.74
ls 614.97
rfi 386.7
rfp 0
th 20
ins 100.000
nm ph

```

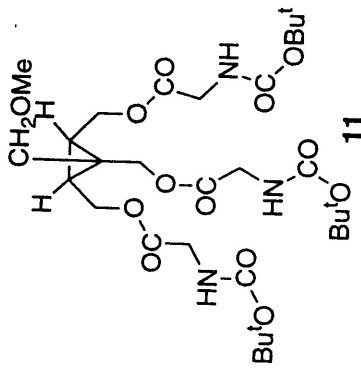

<sup>1</sup>H NMR (CDCl<sub>3</sub>, 400 MHz)

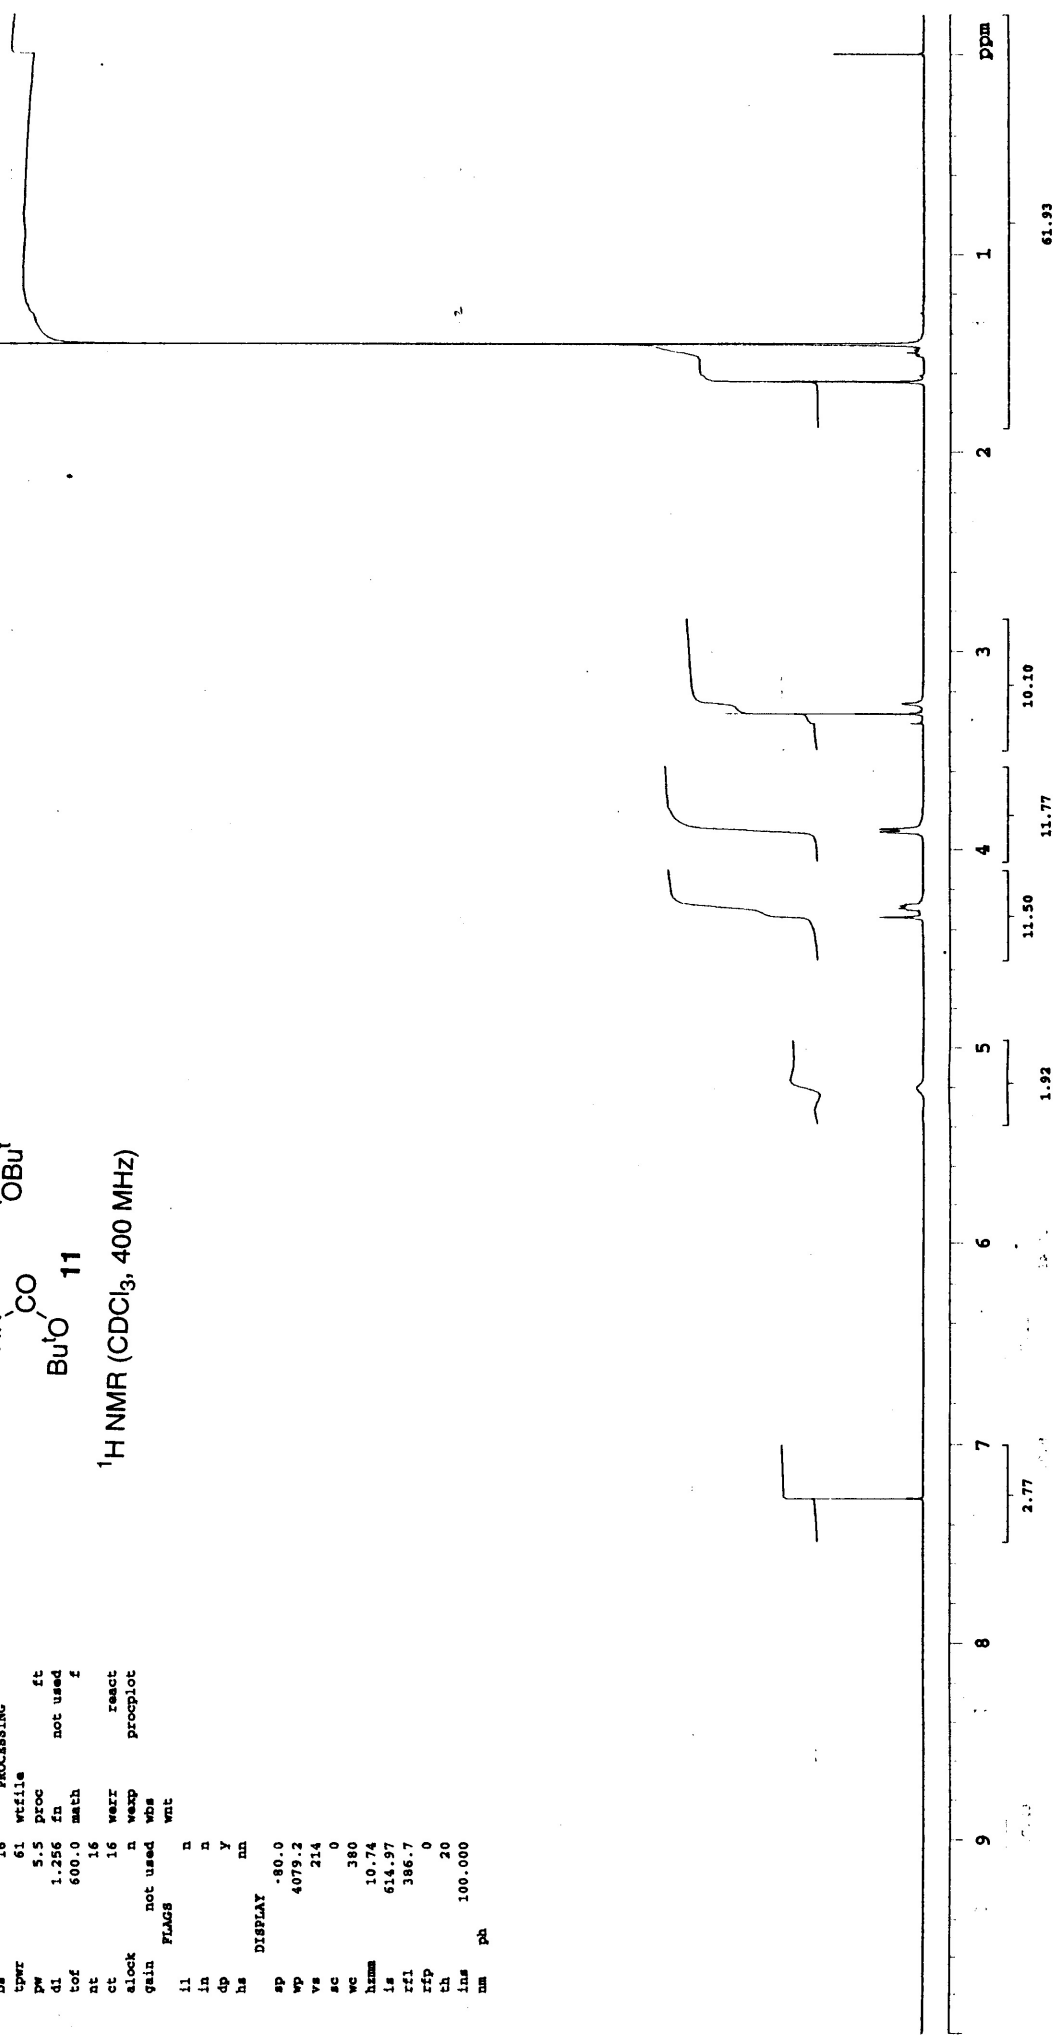

Supplement: 11.pdf [file 11.pdf]
