# Supplementary material for: Synthesis of novel all-cis-functionalized cyclopropane template-assembled collagen models†
Source: Royal Society of Chemistry journal article supplement (doi:10.1039/b103887g), 2001-01-01

CyctriGPPBoc

```

exp2 stdth
SAMPLE DEC. & Yr
date Sep 14 00 dfrq 399.936
solvent CDCl3 dn RI
file exp dpwr 20
ACQUISITION dof 0
sfrq 399.937 dm nnn
tn RI dnm G
at 3.744 dmf 200
mp 44928 dseq
sw 5999.3 dres 1.0
fb 3000 homo n
bs 16 PROCESSING
tpr 61 wfile
pw 5.5 proc ft
dl 1.256 fn not used
tof 600.0 math f
rt 16
ct 16 wevr react
alock n wexp procpilot
gain not used wbs
FLAGS
il n n
in n n
op y y
hs mn
DISPLAY
sp -80.0
wp 4079.2
vs 214
sc 0
wc 380
hsum 10.74
is 1142.70
zfl 383.0
rfp 0
th 20
ins 100.000
nm ph

```

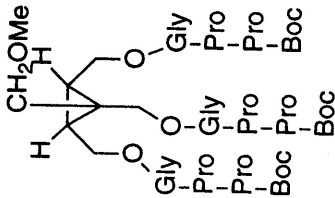

12

<sup>1</sup>H NMR (CDCl<sub>3</sub>, 400 MHz)

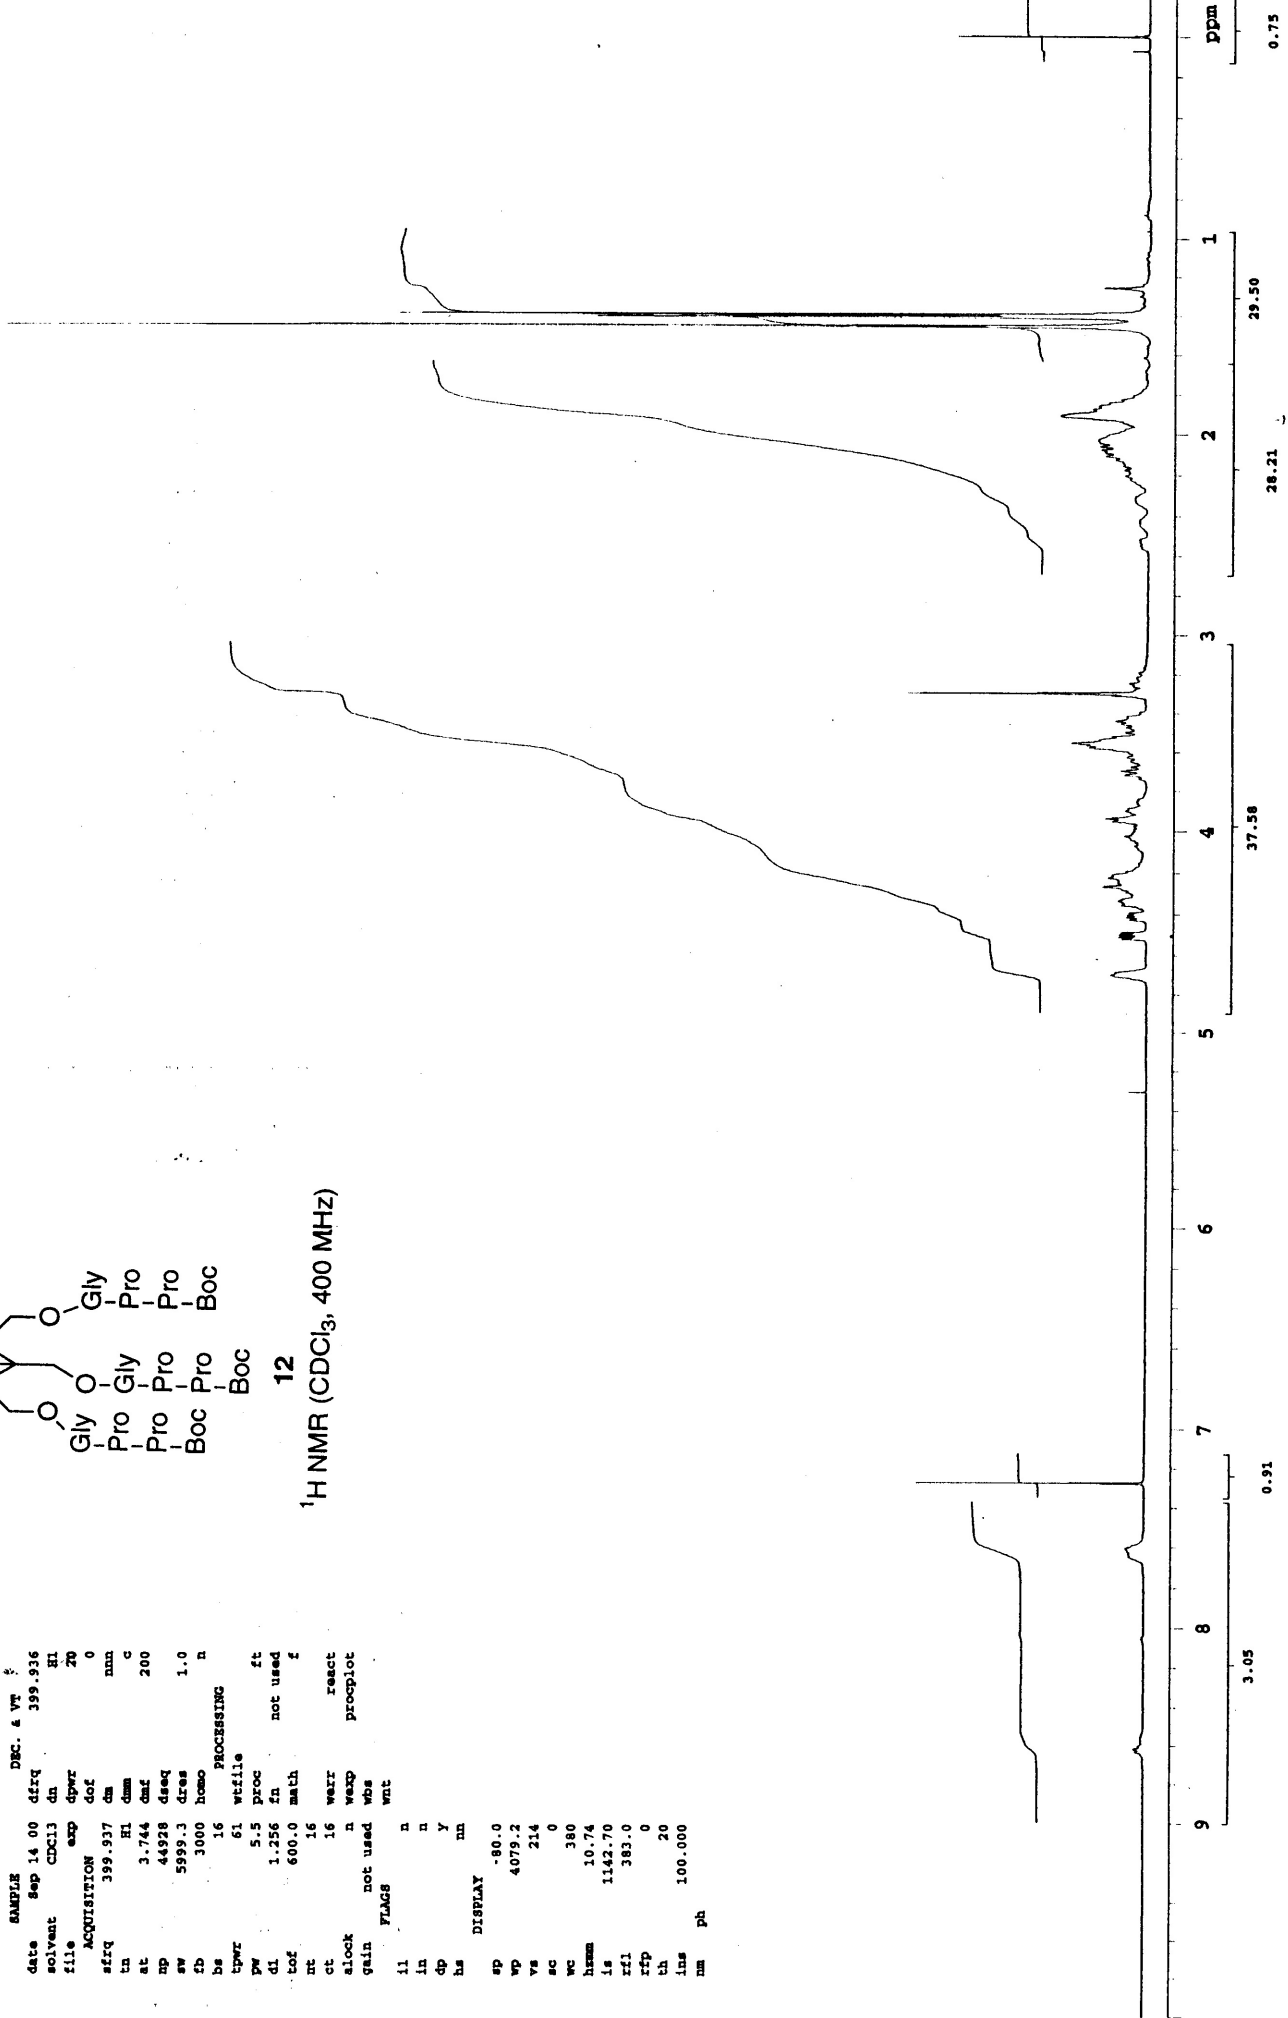

Supplement: 12.pdf [file 12.pdf]
