# Supplementary material for: Synthesis of novel all-cis-functionalized cyclopropane template-assembled collagen models†
Source: Royal Society of Chemistry journal article supplement (doi:10.1039/b103887g), 2001-01-01
Supplement: 13.pdf [file 13.pdf]

Me0002H

exp2 std1h

SAMPLE DMC. & VT  
 date Sep 10 99 dfrq 399.944  
 solvent CDCl3 dn  
 file exp dpr 20  
 ACQUISITION dof 0  
 sfrq 399.945 dm nnn  
 tn 16  
 at 3.744 dmf 200  
 mp 44928 dseq  
 sw 5999.3 dres 1.0  
 fb 3000 homo  
 bs 16 PROCESSING  
 tpr 61 wtfile  
 pw 5.5 proc ft  
 dl 1.256 fn not used  
 tof 600.0 math f  
 nt 16  
 ct 16 vepr react  
 alook n weap procpilot  
 gain not used wds  
 FLAOS vnt

ll n  
 in n  
 dp y  
 bs nm  
 DISPLAY  
 ep -80.0  
 wp 4079.4  
 vs 214  
 ac 0  
 vc 380  
 hnm 10.74  
 ls 500.00  
 rfi 377.0  
 rfp 0  
 th 20  
 las 100.000  
 mn ph

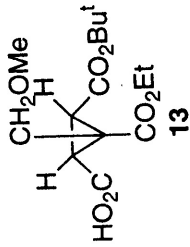

<sup>1</sup>H NMR (CDCl<sub>3</sub>, 400 MHz)

0.01

9

8

7

6

5

4

3

2

1

ppm

0.92

-0.27

9.39

22.99

8.71

56.54

0.16

0.96
