# Supplementary material for: Synthesis of novel all-cis-functionalized cyclopropane template-assembled collagen models†
Source: Royal Society of Chemistry journal article supplement (doi:10.1039/b103887g), 2001-01-01

STANDARD 1K OBSERVE

```

exp2 stdlh
SAMPLE
date Dec 18 99 dirq 399.93K DEC. & VT
solvent CDCl3 dn HI
file exp 20
ACQUISITION
sfrq 399.937 dn nun
tn HI dm c
at 3.744 dmf 200
np 44928 dseq
sw 5995.3 dres 1.0
fb 3000 homo n
bs 16 PROCESSING
tprf 61 wfile
pw 5.5 proc ft
d1 1.256 fn not used
tof 600.0 math f
nt 16
ct 16 warr ract
alock n warr procpot
gain not used wbs
FLAGS
il n
in n
cp Y
hs nm
DISPLAY
sp -80.1
wp 4075.2
vs 214
sc 0
wc 380
hnm 10.74
ls 746.49
rf1 3292.5
rfp 2903.5
th 20
lms 100.000
nm ph
  
```

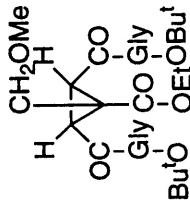

15

<sup>1</sup>H NMR (CDCl<sub>3</sub>, 400 MHz)

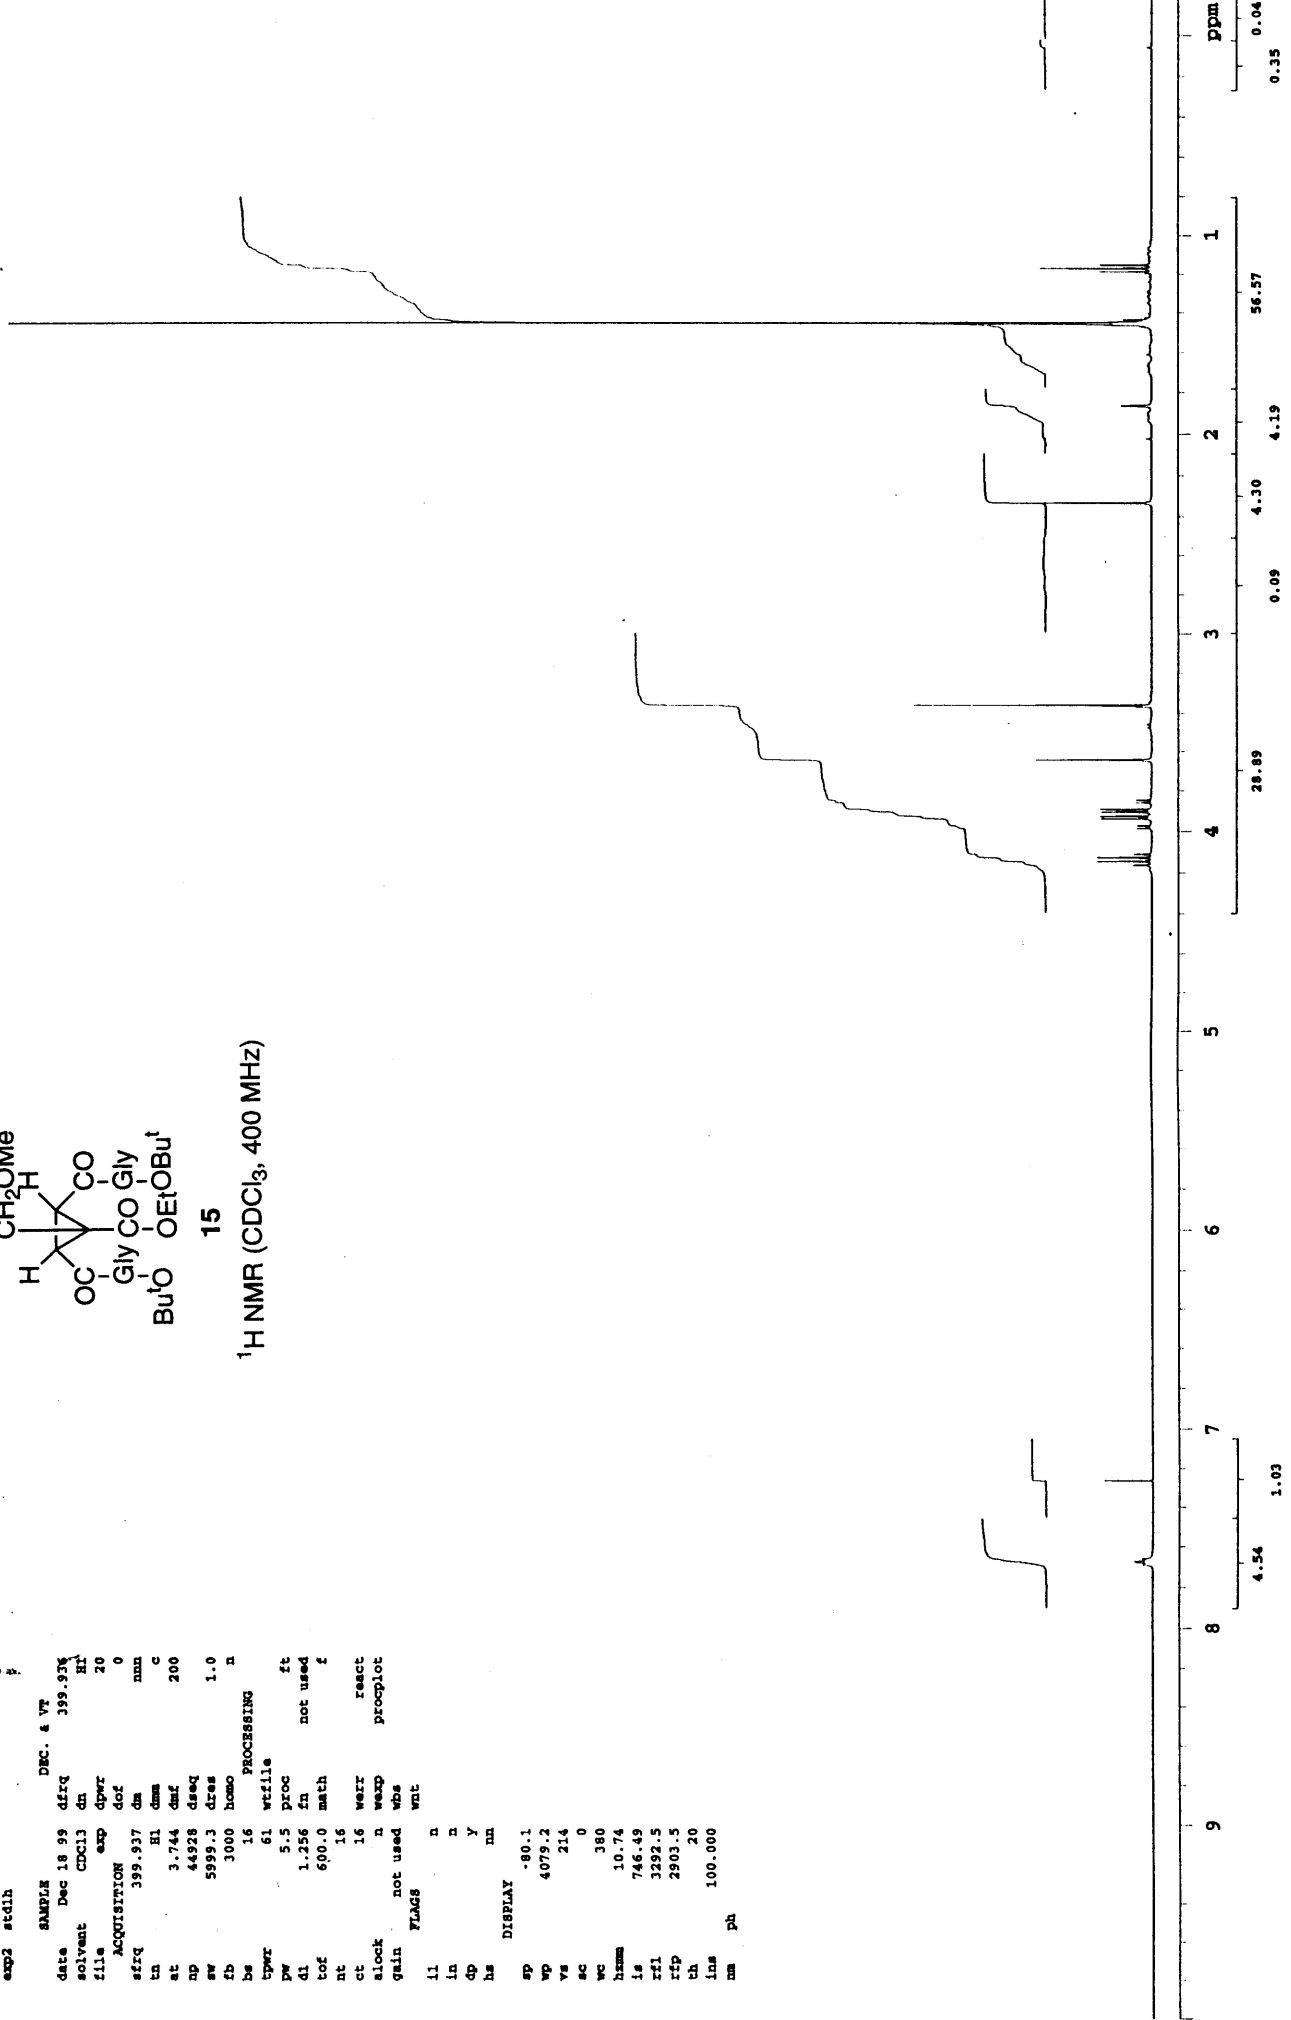

Supplement: 15.pdf [file 15.pdf]
