# Supplementary material for: Synthesis of novel all-cis-functionalized cyclopropane template-assembled collagen models†
Source: Royal Society of Chemistry journal article supplement (doi:10.1039/b103887g), 2001-01-01

Isido?

```

expl stdih
SAMPLE
date Feb 5 00 dfrq 399.936 DEC. & Yr
solvent CDCl3 dn R1
file exp dprw 20
ACQUISITION exp dof 0
sfrq 399.937 dm nnn
tn R1 dm c
at 3.744 dmf 200
mp 44928 dseq
sw 5999.3 dres 1.0
zb 3000 homo n
bs 16 PROCESSING
tprw 61 wtflla
pw 5.5 proc ft
d1 1.256 fa not used
tof 600.0 math f
nt 16
ct 16 werr react
alock n weyp procpilot
gain not used sbs
FLAGS not used wnt
ll n
ln n
cp y
hs mn
DISPLAY -80.0
sp 4079.2
vs 214
sc 0
wc 380
hnmw 10.74
ls 734.33
rf1 382.8
rfp 0
th 20
ins 100.000
nm cdc ph

```

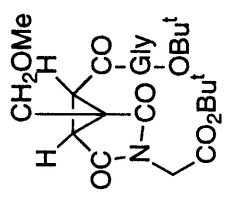

17

<sup>1</sup>H NMR (CDCl<sub>3</sub>, 400 MHz)

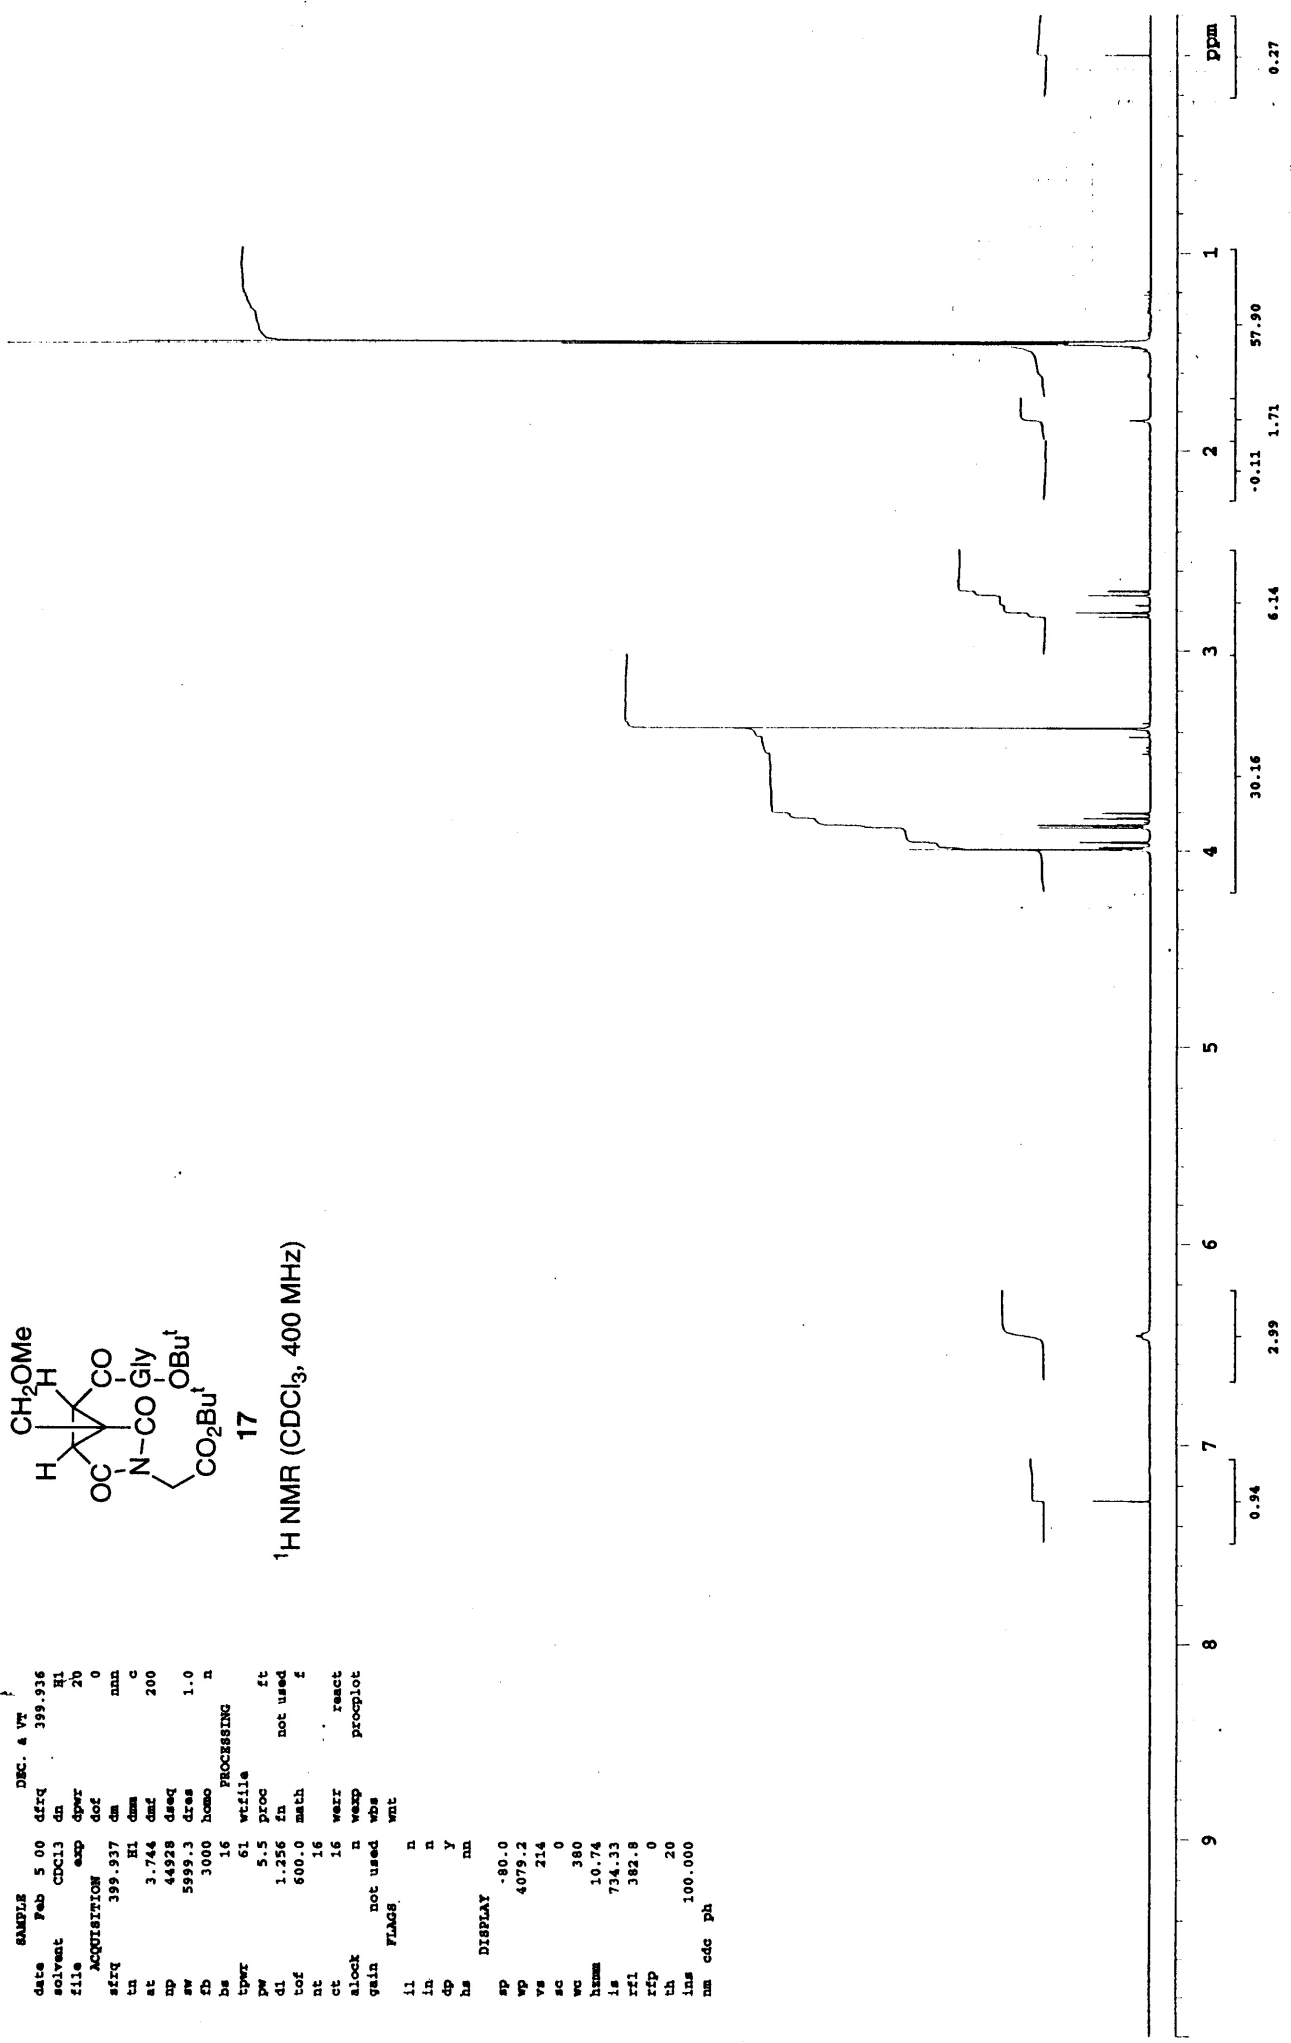

Supplement: 17.pdf [file 17.pdf]
